# Supplementary material
Source: Springer Nature journal article supplement (https://www.springermedizin.de/resource/supplementary/12891_2012_1749_MOESM6_ESM.pdf/9508478)

SFsoc Social SF6D Loen = 0,851 Spread = 0,352 FitRes = -0,542 ChiSq[Pr] = 0,405 SampleN = 133

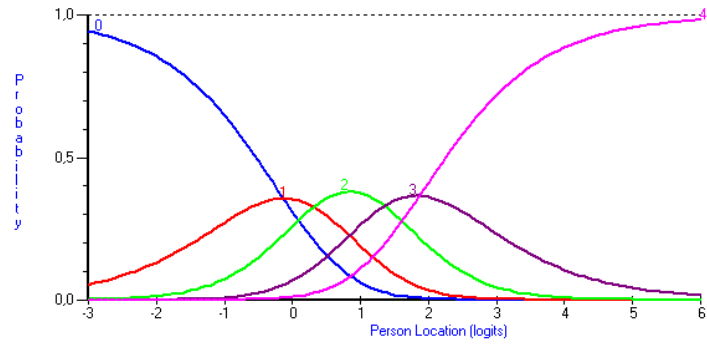

Supplement: MOESM6 [file 9508478]
